# Supplementary material
Source: PubMed Central journal article supplement (PMC1896111)

LN

Spleen

CD3-CD11C<sup>+</sup> cells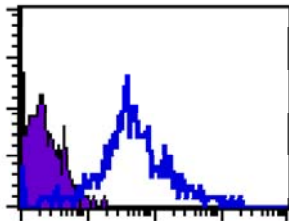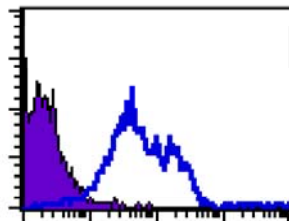CD3-CD11b<sup>+</sup> cells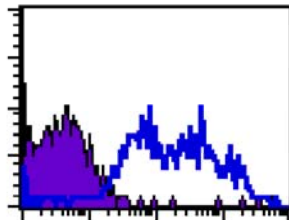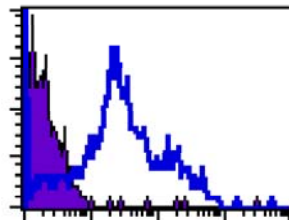

B7H1

Supplement: blood_blood-2006-11-060087_1.pdf [file blood_blood-2006-11-060087_1.pdf]

# mPD-1/CHO cells

B7-H1Ig

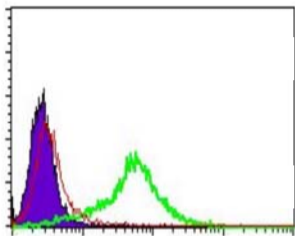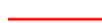

10B5

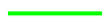

hamster IgG

B7-DCIg

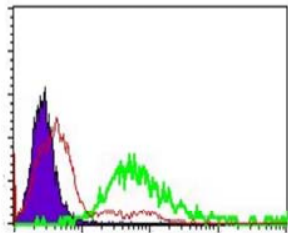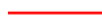

YL-1

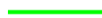

rat IgG

Supplement: blood_blood-2006-11-060087_2.pdf [file blood_blood-2006-11-060087_2.pdf]
